# Supplementary material for: The Establishment of a Tobramycin-Responsive Whole-Cell Micro-Biosensor Based on an Artificial Ribozyme Switch
Source: MDPI journal article supplement (doi:10.3390/life13071553), 2023-07-13
Supplement: s1 [file s1]

## Supporting Information

Table S1. List of primer sequences of plasmid construction.

| Name                                                    | Sequences                                                                                                                                                                                                                                                                                                                | Template       |
|---------------------------------------------------------|--------------------------------------------------------------------------------------------------------------------------------------------------------------------------------------------------------------------------------------------------------------------------------------------------------------------------|----------------|
| pET- eGFP                                               | P1 : <u>CCGCATATGATGGTGAGCAAGGGCGAG</u><br>P2 : <u>GCGGATCCGCTTCTTGTACAGCTCGTCCATG</u>                                                                                                                                                                                                                                   | pET-16b        |
|                                                         | P1:<br>GATAACAATTCCCCTTCTCCTTCGGTACATCCAGCTGAT<br>GAGTCCCAAATAGGACGAAACGCGCTTCGGTGCGTCCT<br>GGATTCCACGAAGGAGATATACCA<br>P2:<br>TGGTATATCTCCTTCGTGGAATCCAGGACGCACCGAAG<br>CGCGTTTCGTCCTATTTGGGACTCATCAGCTGGATGTAC<br>CGAAGGAGAAGGGGAATTGTTATC<br>P1 -1: TTCCACGAAGGAGATATACCATGGGCA<br>P2 -1: AGGAGAAGGGGAATTGTTATCCGCTCA |                |
| pET- eGFP- HHR                                          | P1 : TAAACCTCGTGCCNNNTTTCGTCCTATTTGGGACT<br>P2 : GCTACACTCCTGCCNNNTCCTGGATTCCACGAAGG                                                                                                                                                                                                                                     | pET- eGFP      |
| pET- eGFP- HHR- TOB<br>-A1                              |                                                                                                                                                                                                                                                                                                                          | pET- eGFP- HHR |
| pET- eEGFP- HHR-<br>TOB -A2                             | P1 : CCTAGTCNNNTTTCGTCCTATTTGGGAC<br>P2 : CACTAGTCNNNTCCTGGATTCCACGAA                                                                                                                                                                                                                                                    | pET- eGFP- HHR |
| pET- eGFP- HHR- TOB<br>-A3                              | P1 : TAAACCA NNNTTTCGTCCTATTTGGGACT<br>P2 : GGTAATG NNNTCCTGGATTCCACGAAG                                                                                                                                                                                                                                                 | pET- eGFP- HHR |
| <u>random primer</u> ( for<br>screening of<br>Anti-RBS) | P1 : GATAACAATTCCCCTTNNNNNTTCGGTACATC<br>P2 : TGGTATATCTCCTTCGTGGAATCCAGG                                                                                                                                                                                                                                                | pET- eGFP- HHR |

The single underline represents the restriction enzyme sites of *Nde I* and *BamH I*. The double underline represents the complementary regions of the primer and the template. The italics N represent the random DNA linkage sequence between the HHR ribozyme and the aptamer (N=A/T/C/G).

**Table S2. List of primer sequences of plasmid construction.**

| Name            | Sequence                                                                                                             |
|-----------------|----------------------------------------------------------------------------------------------------------------------|
| H3(HHR variant) | CATGGTATATCTCCTTCGTGGAATCCAGGACGCACCGAAGCGCGTTTCGTCC<br>TATTGGGACTCATCAGCTGGATGTACCGATCAAGA                          |
| F9(HHR variant) | CATGGTATATCTCCTTCGTGGAATCCAGGACGCACCGAAGCGCGTTTCGTCC<br>TATTGGGACTCATCAGCTGGATGTACCGAAGCGAA                          |
| D6(HHR variant) | CATGGTATATCTCCTTCGTGGAATCCAGGACGCACCGAAGCGCGTTTCGTCC<br>TATTGGGACTCATCAGCTGGATGTACCGACGTCAA                          |
| C4              | CATGGTATATCTCCTTCGTGGAATCCAGGAATGGGCAGGAGTGTAGCTAAAC<br>CTCGTGCCCGATTTTCGTCCTATTTGGGACTCATCAGCTGGATGTACCGATCA<br>AGA |
| C7              | CATGGTATATCTCCTTCGTGGAATCCAGGACGCGACTAGTGCCTAGTCGGTTT<br>TCGTCCTATTTGGGACTCATCAGCTGGATGTACCGATCAAGA                  |
| D7              | CATGGTATATCTCCTTCGTGGAATCCAGGAATCGACTAGTGCCTAGTCGGTT<br>TCGTCCTATTTGGGACTCATCAGCTGGATGTACCGATCAAGA                   |
| H6              | CATGGTATATCTCCTTCGTGGAATCCAGGAATGGGACTAGTGCCTAGTCGTCTT<br>TCGTCCTATTTGGGACTCATCAGCTGGATGTACCGATCAAGA                 |

The red nucleotides indicate the mutation sequences. The italics represent the linkage sequences between the HHR ribozyme and the aptamer.

**Table S3. List of primer sequences of in vitro transcription.**

| Name          | Sequences                              | Template                   |
|---------------|----------------------------------------|----------------------------|
| SL-F          | <u>ATATGGCCGCTGCTGTGATGATG</u>         | H3 F9 C4 D7 H6 and mutants |
| SL-R          | <u>TAATACGACTCACTATAGGGGAATTGTGAGC</u> |                            |
| C4-TOB-SS-1-F | <u>GAATGGGCAGGAGTGTAGCTAAAC</u>        | C4                         |
| D7-TOB-SS-1-F | <u>GACGCGACTAGTGCCTAGTCGGTTTTTC</u>    | D7 H6                      |

The double underline represents the complementary regions of the primer and template.

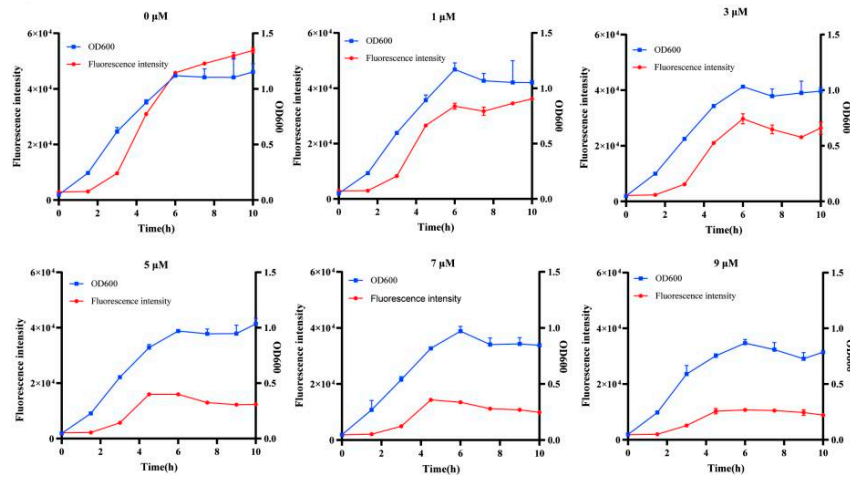

**Figure S1.** Establishment of validated concentrations of tobramycin. The validated concentrations of tobramycin was determined using an F9 vitality test. The synergy effect of OD600 and fluorescence expression shows the F9 growth state.

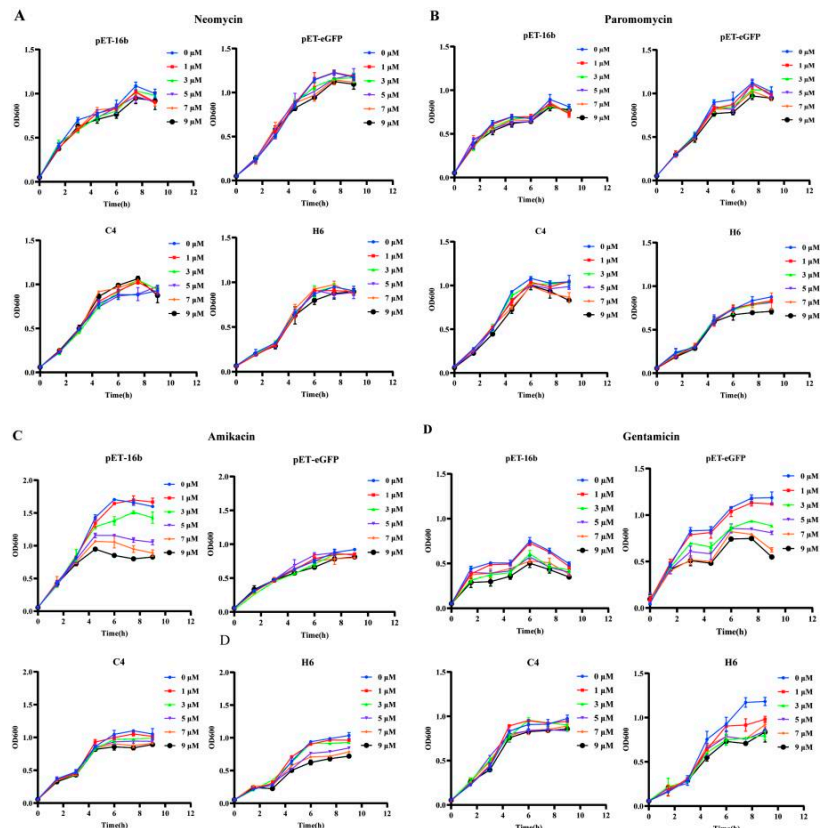

**Figure S2 .** Establishment of validated concentrations of aminoglycoside antibiotics: (A) neomycin, (B) paramycin, (C) amikacin , and (D) gentamicin.

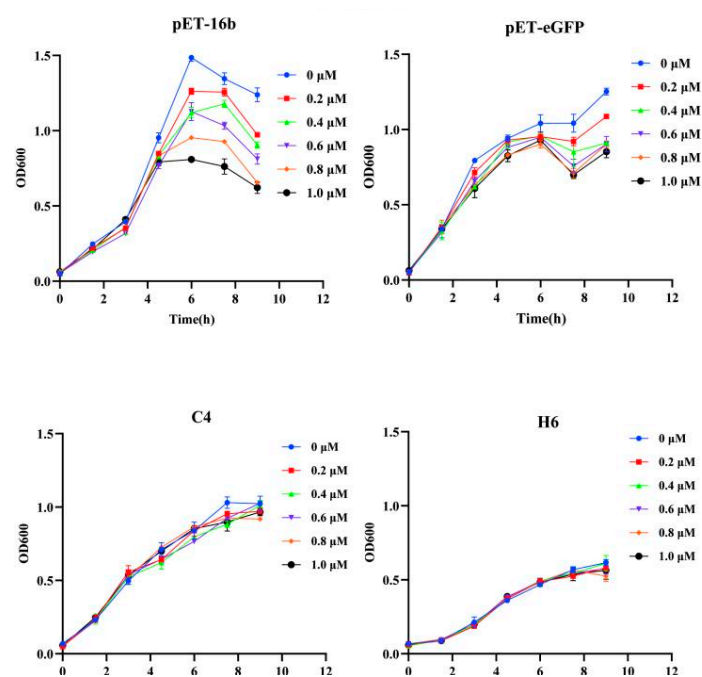

**Figure S3.** Effects of gentamicin on bacteria multiplied with low concentrations ( $<1\mu\text{M}$ ).
